# Supplementary material for: Human papillomavirus 16 E2-, E6- and E7-specific T-cell responses in children and their mothers who developed incident cervical intraepithelial neoplasia during a 14-year follow-up of the Finnish Family HPV cohort
Source: J Transl Med. 2014 Feb 13;12:44. doi: 10.1186/1479-5876-12-44 (PMC3929154; doi:10.1186/1479-5876-12-44)
Supplement: Additional file 1: Table S1 — Characteristics of the mothers with CIN and their children. The table summarizes the mothers’ medical history of cervical lesions, oral and genital HPV status and HPV-specific serology, as well as the oral HPV DNA status and HPV serology of their children, followed since birth until present. The red color represents HPV16 positive DNA sample, the purple HPV16 seropositive sample, the light green color cervical disease of grade LSIL/NCIN/ASCUS, the yellow color CIN2, the blue color represents CIN3 and the light grey negative sample. A = mother, B = child, baseline = time of the birth, 3d = age of 3 days, 1 mo = age of one month etc. [file 1479-5876-12-44-S1.pdf]

|      |   |              | baseline   | 3 d | 1 mo | 2 mo  | 6 mo | 12 mo         | 18 mo      | 24 mo      | 30 mo     | 36 mo     | 42 mo     | 48 mo     | 54 mo      | 60 mo | 66 mo | 72 mo | 78 mo | 84 mo      | 90 mo      | 96 mo | 102mo      | 108 mo | 120 mo | 124 mo |
|------|---|--------------|------------|-----|------|-------|------|---------------|------------|------------|-----------|-----------|-----------|-----------|------------|-------|-------|-------|-------|------------|------------|-------|------------|--------|--------|--------|
| ID1  | A | Cervical HPV | -          |     |      | -     |      | 16,31         |            | -          |           | 16,56     |           |           |            |       |       |       |       |            |            |       |            |        |        |        |
|      |   | Pap/Colp     | NSIL       |     |      |       |      | NSIL          | NSIL       | NSIL       |           | NSIL      |           |           |            |       |       |       |       | NSIL       |            | LSIL  | CIN3       | CIN1   | NSIL   |        |
|      |   | Antibodies   | 6,11,16,18 |     |      |       |      | 6,11,16,18    |            | 6,11,16    |           | 16        |           |           |            |       |       |       |       |            |            |       |            |        |        |        |
|      | B | oral HPV     | -          | -   | -    | -     | -    | -             |            | -          |           | -         |           |           |            |       |       |       |       |            |            |       |            |        |        |        |
| ID2  | A | Cervical HPV | 16,31,42   |     |      | 16,18 |      | 31            |            | 58         | -         | 16,58     |           |           |            |       |       |       |       |            | 16         |       |            |        |        |        |
|      |   | Pap/Colp     | ASCUS      |     |      | NSIL  |      | ASCUS         | NSIL       | NSIL       | NSIL/CIN1 | NSIL/NCIN | NSIL/NCIN | NSIL/NCIN |            |       |       |       |       |            | NSIL       | NSIL  |            |        |        |        |
|      |   | Antibodies   | 6,16       |     |      |       |      | 16,11,18      |            | 6,16       |           | 6,18      |           |           |            |       |       |       |       |            |            |       |            |        |        |        |
|      | B | oral HPV     | 31         | -   | -    | -     | -    | -             |            | -          |           | 70        |           |           |            |       |       |       | 18    |            |            |       |            | 31     |        |        |
| ID3  | A | Cervical HPV | 31         |     |      | 31    |      | 16, 70        |            | 6, 82      |           | 16        |           |           |            |       |       |       |       |            |            |       |            |        |        |        |
|      |   | Pap/Colp     | ASCUS      |     |      |       |      | NSIL          |            | NSIL       |           | NSIL      |           |           |            |       |       |       |       |            | LSIL       | CIN2  | CIN2       | NSIL   |        |        |
|      |   | Antibodies   | 6          |     |      |       |      | 6, 16, 18     |            | 6, 18      |           |           |           |           |            |       |       |       |       |            |            |       |            |        |        |        |
|      | B | oral HPV     | 31         | 6   | 33   | -     | -    | -             |            | -          |           |           |           |           |            |       |       |       | 31    |            |            |       |            |        |        |        |
| ID4  | A | Cervical HPV | -          |     |      | -     | -    | 58            |            | 18, 31     |           | 16, 39    |           |           |            |       |       |       | -     |            |            |       |            |        |        | 31     |
|      |   | Pap/Colp     | NSIL       |     |      |       |      | NSIL          | NSIL       | NSIL       |           | NSIL      |           |           |            |       |       |       |       | NSIL       | NSIL       |       |            | HSIL   | CIN2   | CIN3   |
|      |   | Antibodies   | 16         |     |      |       |      | 6, 16, 18     |            | 6, 16      |           | 6         |           |           |            |       |       |       |       |            |            |       |            |        |        |        |
|      | B | oral HPV     | -          | -   | -    | -     | -    | -             |            | -          |           | -         |           |           |            |       |       |       |       |            |            |       |            |        |        |        |
| ID5  | A | Cervical HPV | -          |     |      | -     | -    | 16, 59        |            | 16         |           | 16        |           |           |            |       |       |       |       | -          | 16         | 16    |            |        |        |        |
|      |   | Pap/Colp     | NSIL       |     |      |       |      | NSIL          |            | NSIL       |           | NSIL      |           |           |            |       |       |       | ASCUS | ASCUS      |            | CIN3  | CIN3       | NCIN   | NSIL   |        |
|      |   | Antibodies   | -          |     |      |       |      | -             |            | -          |           | -         |           |           |            |       |       |       |       |            |            |       |            |        |        |        |
|      | B | oral HPV     | 6          |     |      |       |      | -             |            | -          |           | -         |           |           |            |       |       |       |       |            |            |       |            |        |        |        |
| ID6  | A | Cervical HPV | 43         |     |      | 18,31 |      | 18            |            | 51         |           | 51        |           |           |            |       |       |       | -     |            |            |       |            |        | 58     | 58     |
|      |   | Pap/Colp     | NSIL       |     |      |       |      | ASCUS         | LSIL, NCIN | NSIL, NCIN | ASCUS     | ASCUS     | NSIL/NCIN | LSIL/NCIN | ASCUS/NCIN |       | ASCUS |       | NSIL  | NSIL       |            | NSIL  | HSIL       | CIN3   | CIN3   | NCIN   |
|      |   | Antibodies   | 6,16,18,45 |     |      |       |      | 6,16,18,45,11 |            |            | 6,16,18   | 6,16,18   |           |           |            |       |       |       |       |            |            |       |            |        |        |        |
|      | B | oral HPV     | -          | -   | 18   | -     | -    | -             |            | -          |           | -         |           |           |            |       |       |       |       |            |            |       |            |        |        |        |
| ID7  | A | Cervical HPV | 16         |     |      | -     |      | 16            |            | 16         |           | 16        |           |           |            |       |       |       | 16    |            |            | 16    | 16         |        |        |        |
|      |   | Pap/Colp     | NSIL       |     |      |       |      | NSIL          |            | NSIL       |           | NSIL      |           |           |            |       |       |       | ASCUS | ASCUS      |            | CIN3  | CIN3       | NSIL   | NSIL   |        |
|      |   | Antibodies   | 16         |     |      |       |      | 16            |            | 16         |           |           |           |           |            |       |       |       |       |            |            |       |            |        |        |        |
|      | B | oral HPV     | -          | -   | -    | -     | -    | -             |            | -          |           | -         |           |           |            |       |       |       |       |            |            |       |            |        |        |        |
| ID8  | A | Cervical HPV | 16         |     |      | 16    |      | 16            |            | 16         |           | 16        |           |           |            |       |       |       | 16    | 16         |            |       |            |        |        |        |
|      |   | Pap/Colp     | NSIL       |     |      |       |      | NSIL          |            | NSIL       |           | NSIL      |           |           |            |       |       | CIN2  | NCIN  | NCIN/ NSIL | NSIL       | NSIL  |            |        | CIN2   |        |
|      |   | Antibodies   | -          |     |      |       |      | -             |            | -          |           | -         |           |           |            |       |       |       |       |            |            |       |            |        |        |        |
|      | B | oral HPV     | 16         |     | 16   | -     | -    | -             |            | -          |           | -         |           |           |            |       |       |       | -     |            |            |       |            |        |        |        |
| ID9  | A | Cervical HPV | 16,59      |     |      | 16,59 |      |               |            |            |           |           |           |           |            |       |       |       | 16    | 16         |            |       | -          |        |        |        |
|      |   | Pap/Colp     |            |     |      |       |      |               |            |            |           |           |           |           |            |       |       |       | ASCUS | CIN2       | CIN2       | CIN1  | CIN2       | NSIL   |        |        |
|      |   | Antibodies   | 6          |     |      |       |      |               |            |            |           |           |           |           |            |       |       |       |       |            |            |       |            |        |        |        |
|      | B | oral HPV     | -          | -   | -    | -     | -    | -             |            | -          |           | -         |           |           |            |       |       |       | -     |            |            |       |            |        |        |        |
| ID10 | A | Cervical HPV | -          |     |      | -     |      | -             |            | -          |           | 16        |           |           |            |       |       |       |       | 16, 56     |            |       |            | 16, 66 | 16, 66 |        |
|      |   | Pap/Colp     | NSIL       |     |      |       |      | NSIL          |            | NSIL       |           | NSIL      |           |           |            |       |       |       | NSIL  | LSIL       | LSIL, NCIN |       | LSIL/ CIN1 | NCIN   |        |        |
|      |   | Antibodies   | -          |     |      |       |      | 16            |            | -          |           | -         |           |           |            |       |       |       |       |            |            |       |            |        |        |        |
|      | B | oral HPV     | 16         |     | 16   | -     | -    | -             |            | -          |           | -         |           |           |            |       |       |       | -     |            |            |       |            |        |        |        |
|      |   | Antibodies   | -          |     | -    | -     | -    | 6             |            | -          |           | -         |           |           |            |       |       |       |       |            |            |       |            |        |        |        |
|      |   |              | baseline   | 3 d | 1 mo | 2 mo  | 6 mo | 12 mo         | 18 mo      | 24 mo      | 30 mo     | 36 mo     | 42 mo     | 48 mo     | 54 mo      | 60 mo | 66 mo | 72 mo | 78 mo | 84 mo      | 90 mo      | 96 mo | 102mo      | 108 mo | 120 mo | 124 mo |
